# Supplementary material for: Medial septum tau accumulation induces spatial memory deficit via disrupting medial septum–hippocampus cholinergic pathway
Source: PubMed Central journal article supplement (PMC8161512; doi:10.1002/ctm2.428), 2021-05-28
Supplement: CTM2-11-e428-s001.pdf [file CTM2-11-e428-s001.pdf]

## Supplementary figures

### sFigure 1

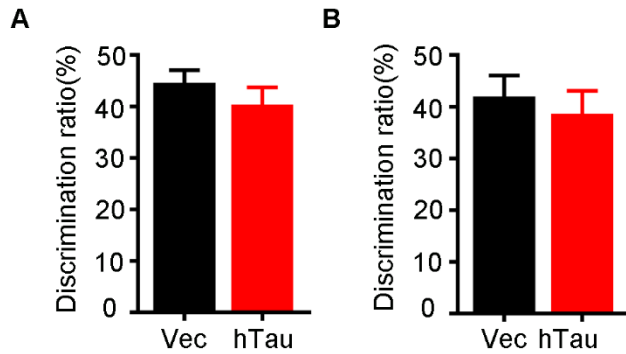

**sFigure 1. Overexpressing hTau in MS does not affect novel object recognition memory.** (A) 3 months after MS overexpression of AAV-hTau,  $n = 10-15$  mice per group, unpaired  $t$  test,  $t = 0.9754$   $df = 23$ ,  $P > 0.05$ . (B) 6 months after MS overexpression of AAV-hTau,  $n = 10-15$  mice per group, unpaired  $t$  test,  $t = 0.5499$   $df = 27$ ,  $P > 0.05$ . Data were presented as mean  $\pm$  SEM.

## sFigure 2

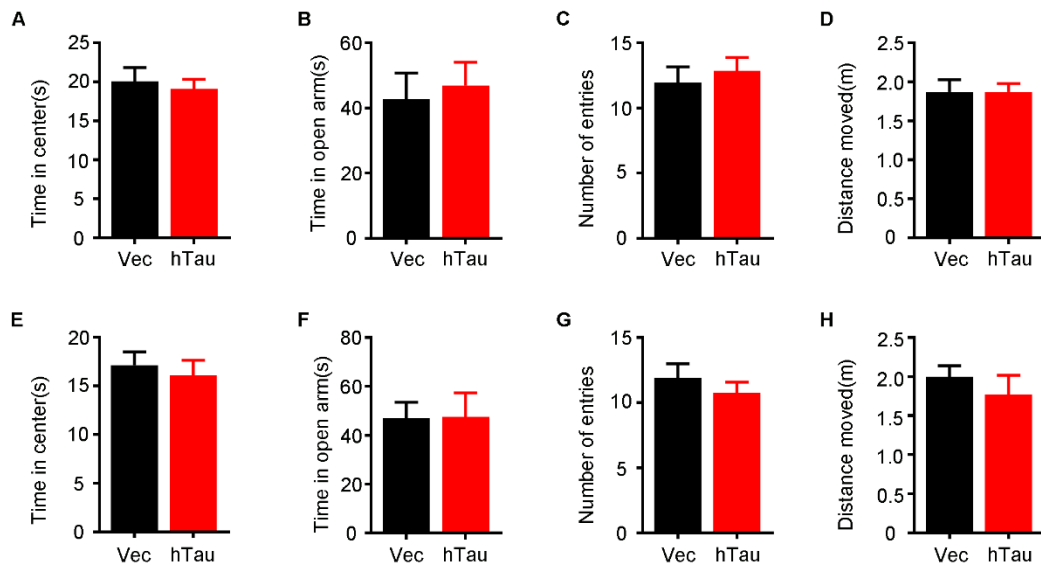

**sFigure 2. Overexpressing hTau in MS does not induce anxiety-like behavior in MS<sup>hTau</sup> mice.** Open field test (A, E) and elevated plus maze test (B-D, F-H) were performed. No difference of time in center (A, E), time in open arm (B, F) and open arm entry (C, G) were shown between MS<sup>vec</sup> and MS<sup>hTau</sup> mice. For 3 months after MS hTau overexpression, n = 10-15 mice per group, unpaired *t* test,  $t = 0.4826$   $df = 24$ ,  $P > 0.05$  (A, time in center); or  $t = 0.3933$   $df = 22$ ,  $P > 0.05$  (B, time in open arm); or  $t = 0.5758$   $df = 21$ ,  $P > 0.05$  (C, open arm entry); or  $t = 0.005621$   $df = 25$ ,  $P > 0.05$  (D, distance moved). For 6 months after MS hTau overexpression, n = 10-15 mice per group, unpaired *t* test,  $t = 0.5122$   $df = 22$ ,  $P > 0.05$  (E, time in center); or  $t = 0.04848$   $df = 20$ ,  $P = 0.9618$  (F, time in open arm); or  $t = 0.8646$   $df = 19$ ,  $P > 0.05$  (G, open arm entry); or  $t = 0.8440$   $df = 25$ ,  $P > 0.05$  (H, distance moved). Data were presented as mean  $\pm$  SEM.

## Supplementary tables

**sTable 1**

**The top 15 up-regulated differentially expressed proteins (DEPs) in Vec:veh vs MS<sup>hTau</sup> group**

| Protein | Grouping          |                               |                                 |                                 |
|---------|-------------------|-------------------------------|---------------------------------|---------------------------------|
|         | Vec:veh (n=4)     | MS <sup>hTau</sup> :veh (n=3) | MS <sup>hTau</sup> :DZ(L) (n=4) | MS <sup>hTau</sup> :DZ(H) (n=4) |
| STAT1   | 0.867723±0.028608 | 1.127335±0.039638             | -                               | -                               |
| AIF1    | 0.891054±0.043824 | 1.172083±0.040145             | 0.941832±0.030447               | -                               |
| IFIT3   | 0.873289±0.047846 | 1.162859±0.028778             | -                               | -                               |
| C1QA    | 0.857073±0.04464  | 1.156626±0.031093             | 0.91963±0.01657                 | -                               |
| CLD11   | 0.918516±0.035997 | 1.245412±0.131718             | -                               | -                               |
| TPSN    | 0.829519±0.017523 | 1.14166±0.097453              | -                               | -                               |
| GBP4    | 0.866065±0.055694 | 1.221984±0.087853             | -                               | -                               |
| HA11    | 0.857359±0.016084 | 1.211533±0.076491             | 0.906532±0.081473               | -                               |
| GFAP    | 0.805562±0.021275 | 1.221036±0.132556             | -                               | -                               |
| IIGP1   | 0.810976±0.037984 | 1.245658±0.144553             | -                               | -                               |
| IRGM1   | 0.824163±0.036841 | 1.293765±0.078868             | 0.879048±0.090735               | -                               |

|       |                       |                   |                   |   |
|-------|-----------------------|-------------------|-------------------|---|
| IGHA  | 0.681882±0.<br>023736 | 1.08046±0.08342   | -                 | - |
| PSB8  | 0.773077±0.<br>022639 | 1.228403±0.052214 | -                 | - |
| S10A6 | 0.786228±0.<br>031363 | 1.257172±0.228963 | -                 | - |
| IGHM  | 0.574758±0.<br>092829 | 1.663775±0.260839 | 0.699626±0.173127 | - |

**sTable 2**

**The top 15 down-regulated differentially expressed proteins (DEPs) in Vec:veh vs MS<sup>hTau</sup> group**

| Protein | Grouping          |                               |                                 |                                 |
|---------|-------------------|-------------------------------|---------------------------------|---------------------------------|
|         | Vec:veh (n=4)     | MS <sup>hTau</sup> :veh (n=3) | MS <sup>hTau</sup> :DZ(L) (n=4) | MS <sup>hTau</sup> :DZ(H) (n=4) |
| KLDC4   | 1.356578±0.078396 | 0.683064±0.147207             | -                               | -                               |
| S29A1   | 1.197628±0.12626  | 0.636127±0.120676             | -                               | 1.046025±0.053886               |
| LAD1    | 1.132309±0.126257 | 0.718013±0.111504             | 1.089028±0.019657               | 0.990153±0.02422                |
| LRFN5   | 1.101031±0.052344 | 0.71772±0.136019              | 1.146596±0.081776               | -                               |
| SENP7   | 0.96118±0.034541  | 0.662861±0.094933             | 1.285554±0.128007               | 1.00612±0.085685                |
| VWF     | 1.095346±0.065769 | 0.777465±0.062261             | 1.090642±0.058394               | -                               |
| CPTP    | 1.112783±0.04531  | 0.811406±0.089863             | -                               | -                               |
| SYTL4   | 1.022702±0.046996 | 0.76104±0.042287              | 1.154798±0.044964               | 1.00172±0.038575                |
| PERI    | 1.05395±0.098073  | 0.789833±0.018686             | 1.077725±0.040215               | 1.02595±0.033756                |
| MNARL   | 1.121862±0.066664 | 0.846557±0.06295              | -                               | -                               |
| VP37D   | 1.00711±0.035125  | 0.763247±0.071989             | 1.190753±0.030767               | 0.979701±0.036441               |
| CD2B2   | 1.040066±0.083526 | 0.791044±0.025873             | 1.099758±0.039808               | 1.016892±0.059873               |

|       |                       |                   |   |                       |
|-------|-----------------------|-------------------|---|-----------------------|
| OS9   | 1.135266±0<br>.036994 | 0.86383±0.077718  | - | -                     |
| AGRP  | 1.071368±0<br>.056671 | 0.820164±0.030231 | - | -                     |
| HMCS2 | 1.092863±0<br>.033541 | 0.843392±0.008601 | - | 1.028653±0.<br>050647 |
